# Supplementary material for: Effective suppression of lithium dendrite growth using fluorinated polysulfonamide-containing single-ion conducting polymer electrolytes
Source: Royal Society of Chemistry journal article supplement (doi:10.1039/d0ma00260g), 2020-01-01
Supplement: d0ma00260g1.pdf [file d0ma00260g1.pdf]

# **Effective Suppression of Lithium Dendrite Growth Using Fluorinated Polysulfonamide Containing Single-Ion Conducting Polymer Electrolyte**

*Yunyun Zhong<sup>1</sup>, Jianwei Zhang<sup>1</sup>, Min Xiao<sup>1</sup>, Dongmei Han<sup>2</sup>, Shan Ren<sup>1</sup>, Shuanjin Wang<sup>1</sup>,  
Yuezhong Meng<sup>1\*</sup>*

1. The Key Laboratory of Low-carbon Chemistry & Energy Conservation of Guangdong Province/State Key Laboratory of Optoelectronic Materials and Technologies, School of Materials Science and Engineering, Sun Yat-sen University, Guangzhou 510275, P. R. China.
2. School of Chemical Engineering and Technology, Sun Yat-sen University, Zhuhai 519082, P. R. China.

\*E-mail: mengyzh@mail.sysu.edu.cn (Yuezhong Meng)

\*E-mail: stsxm@mail.sysu.edu.cn (Min Xiao)

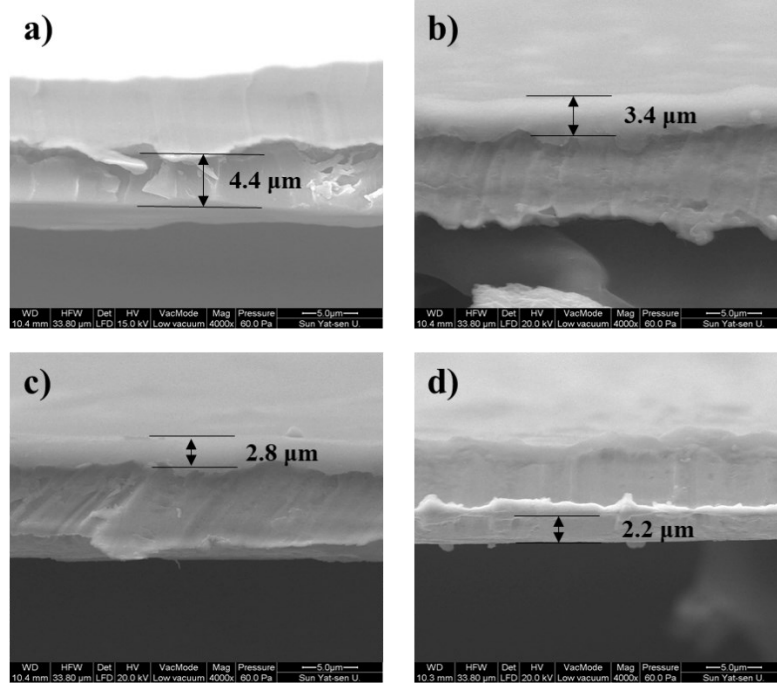

Fig. S1 SEM images of LFPP layer coated on Cu foil, a) 5% LFPP; b) 3% LFPP; c) 1% LFPP; d) 0.5% LFPP.

Table 1 Ionic conductivity of the LFPP SEI layer in DMC/EC/EMC (vol. %=1:1:1).

| Concentration | $\Phi_{SS}$ (mm) | $\delta_{SEI}$ ( $\mu\text{m}$ ) | $\delta_{PP}$ ( $\mu\text{m}$ ) | $R_0$ ( $\Omega$ ) | $\sigma$ ( $\text{mS cm}^{-1}$ ) |
|---------------|------------------|----------------------------------|---------------------------------|--------------------|----------------------------------|
| 5%            | 15.5             | 9.90                             | 25.0                            | 25.6               | 0.0927                           |
| 3%            | 15.5             | 7.87                             | 25.0                            | 32.4               | 0.0667                           |
| 1%            | 15.5             | 6.07                             | 25.0                            | 46.4               | 0.0424                           |
| 0.5%          | 15.5             | 4.95                             | 25.0                            | 65.2               | 0.0284                           |
